# Supplementary material for: Personal and Professional Factors Associated With Work-Life Integration Among US Physicians
Source: PubMed Central journal article supplement (PMC8160595; doi:10.1001/jamanetworkopen.2021.11575), 2021-05-27
Supplement: jamanetwopen-e2111575-s001.pdf [file jamanetwopen-e2111575-s001.pdf]

## Supplemental Online Content

Tawfik DS, Shanafelt TD, Dyrbye LN, et al. Personal and professional factors associated with work-life integration among US physicians. *JAMA Netw Open*. 2021;4(5):e2111575. doi:10.1001/jamanetworkopen.2021.11575

**eFigure 1.** Work-Life Integration for Surgical Specialties, for Males (X-axis) and Females (Y-axis)

**eFigure 2.** Work-Life Integration for General Medical Specialties, for Males (X-axis) and Females (Y-axis)

**eFigure 3.** Work-Life Integration for Medical Subspecialties, for Males (X-axis) and Females (Y-axis)

**eFigure 4.** Work-Life Integration by Practice Setting, for Males (X-axis) and Females (Y-axis)

**eFigure 5.** Work-Life Integration by Hours Worked Per Week, for Males (X-axis) and Females (Y-axis)

**eFigure 6.** Work-Life Integration by Physician Sex and Physician Age

**eFigure 7.** Work-Life Integration by Physician Sex and Youngest Child's Age in Years

**eTable 1.** Univariate Screen of Variables Associated With Work-Life Integration

**eTable 2.** Interaction Model. Multivariable Linear Regression Showing Personal/Professional Factors and Interactions as Independent Variables Associated With Work-Life Integration

This supplemental material has been provided by the authors to give readers additional information about their work.

# Surgical Specialties

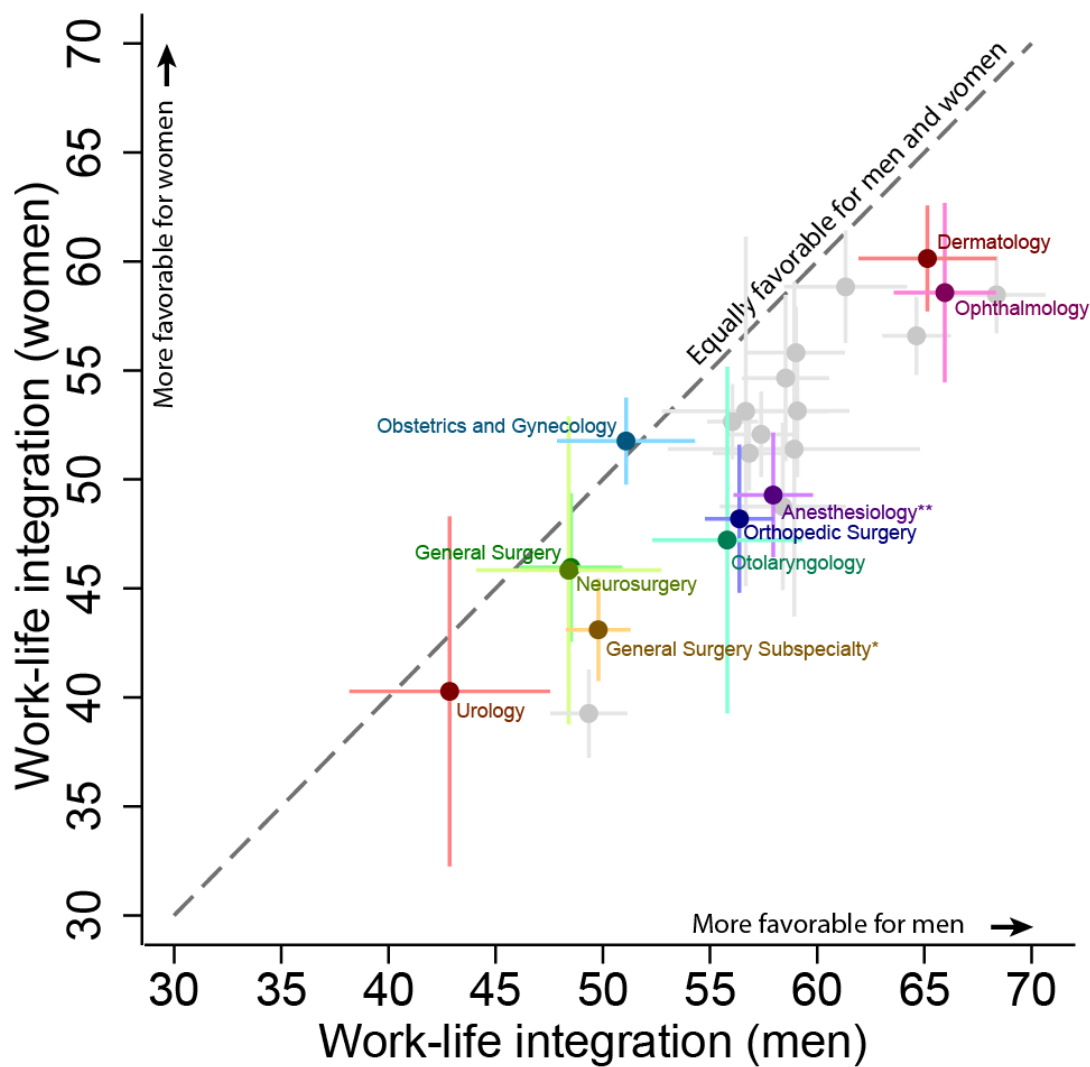

**eFigure 1.** Work-life integration for surgical specialties, for males (x-axis) and females (y-axis), shown as means and standard errors. Asterisks denote significantly different work-life integration scores between male and female respondents, via two-tailed t-test. \* indicates  $P < .05$ ; \*\* indicates  $P < .01$ ; \*\*\* indicates  $P < .001$

## General/Broad Medical Specialties

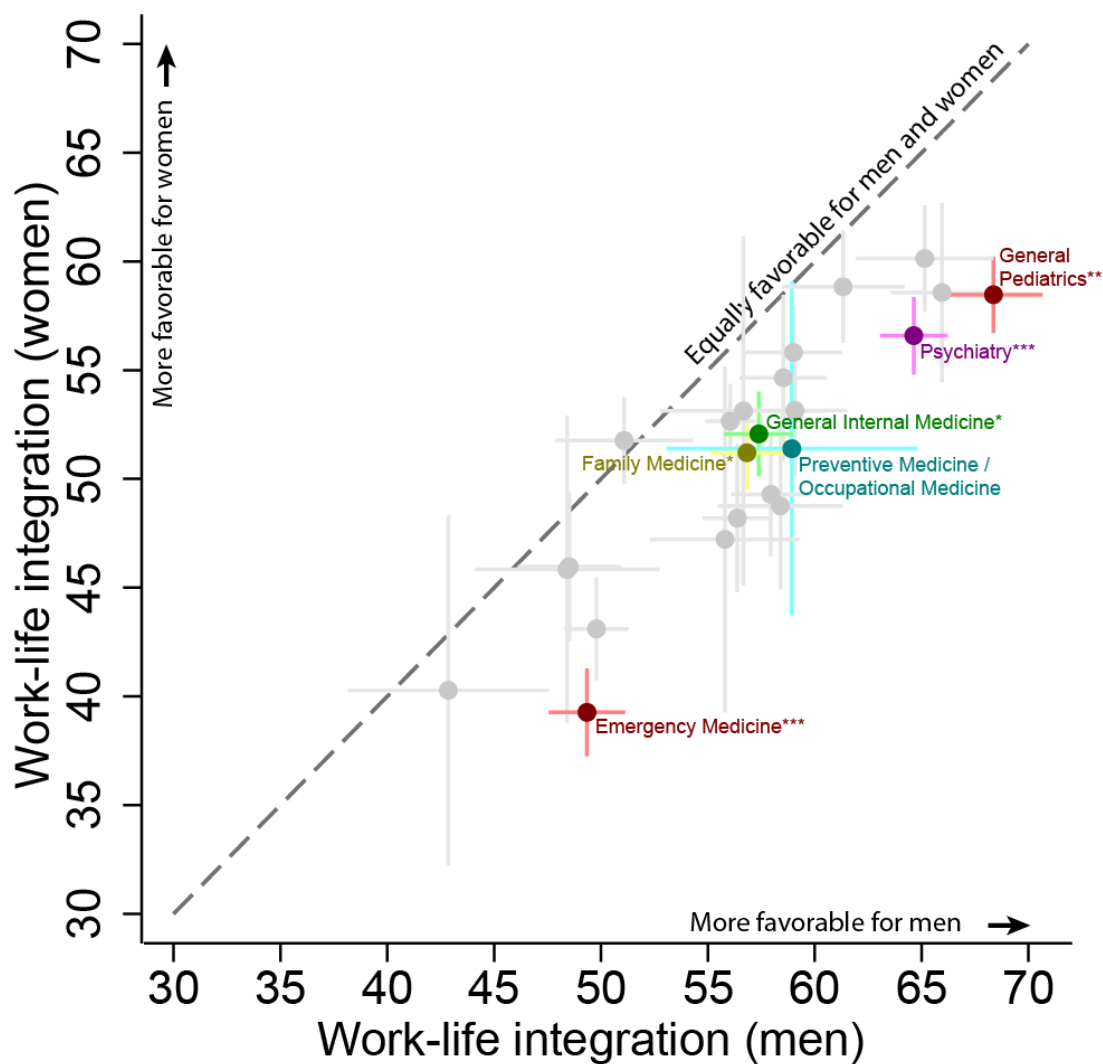

**eFigure 2.** Work-life integration for general medical specialties, for males (x-axis) and females (y-axis), shown as means and standard errors. Asterisks denote significantly different work-life integration scores between male and female respondents, via two-tailed t-test. \* indicates  $P < .05$ ; \*\* indicates  $P < .01$ ; \*\*\* indicates  $P < .001$

# Medical Subspecialties

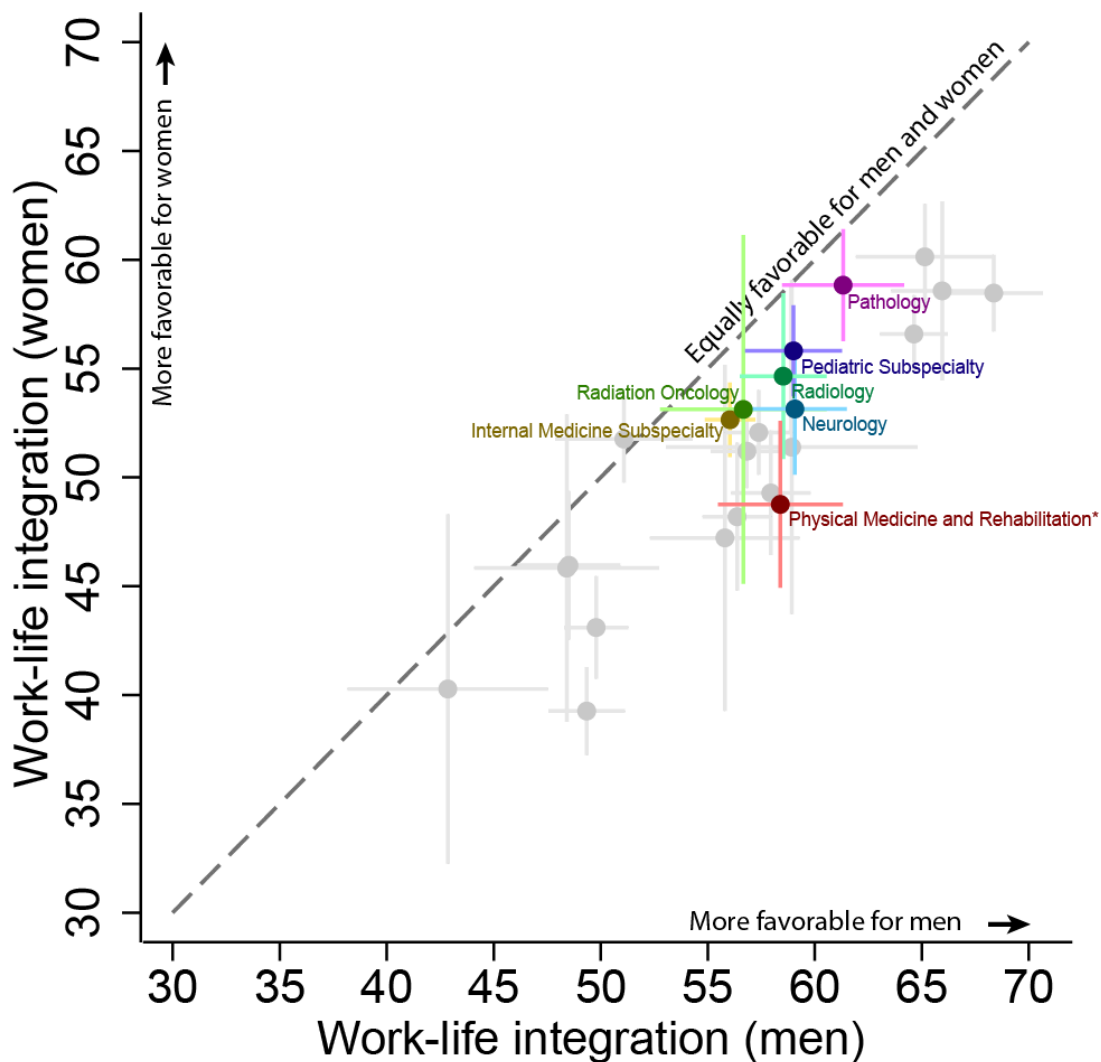

**eFigure 3.** Work-life integration for medical subspecialties, for males (x-axis) and females (y-axis), shown as means and standard errors. Asterisks denote significantly different work-life integration scores between male and female respondents, via two-tailed t-test. \* indicates  $P < .05$ ; \*\* indicates  $P < .01$ ; \*\*\* indicates  $P < .001$

## Practice Setting

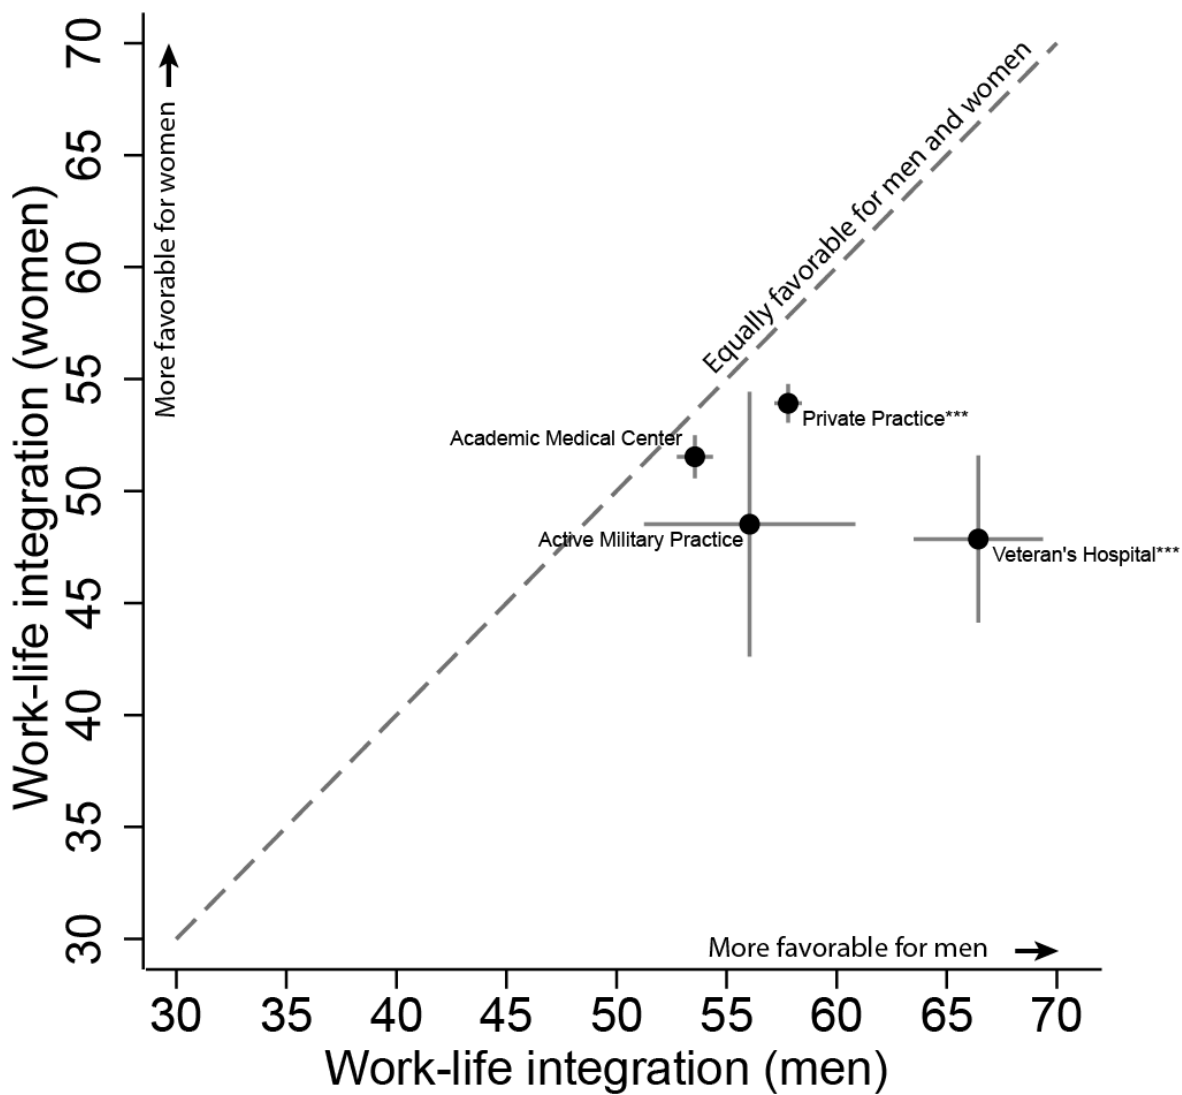

**eFigure 4.** Work-life integration by practice setting, for males (x-axis) and females (y-axis), shown as means and standard errors. Asterisks denote significantly different work-life integration scores between male and female respondents, via two-tailed t-test. \* indicates  $P < .05$ ; \*\* indicates  $P < .01$ ; \*\*\* indicates  $P < .001$

## Average hours worked per week

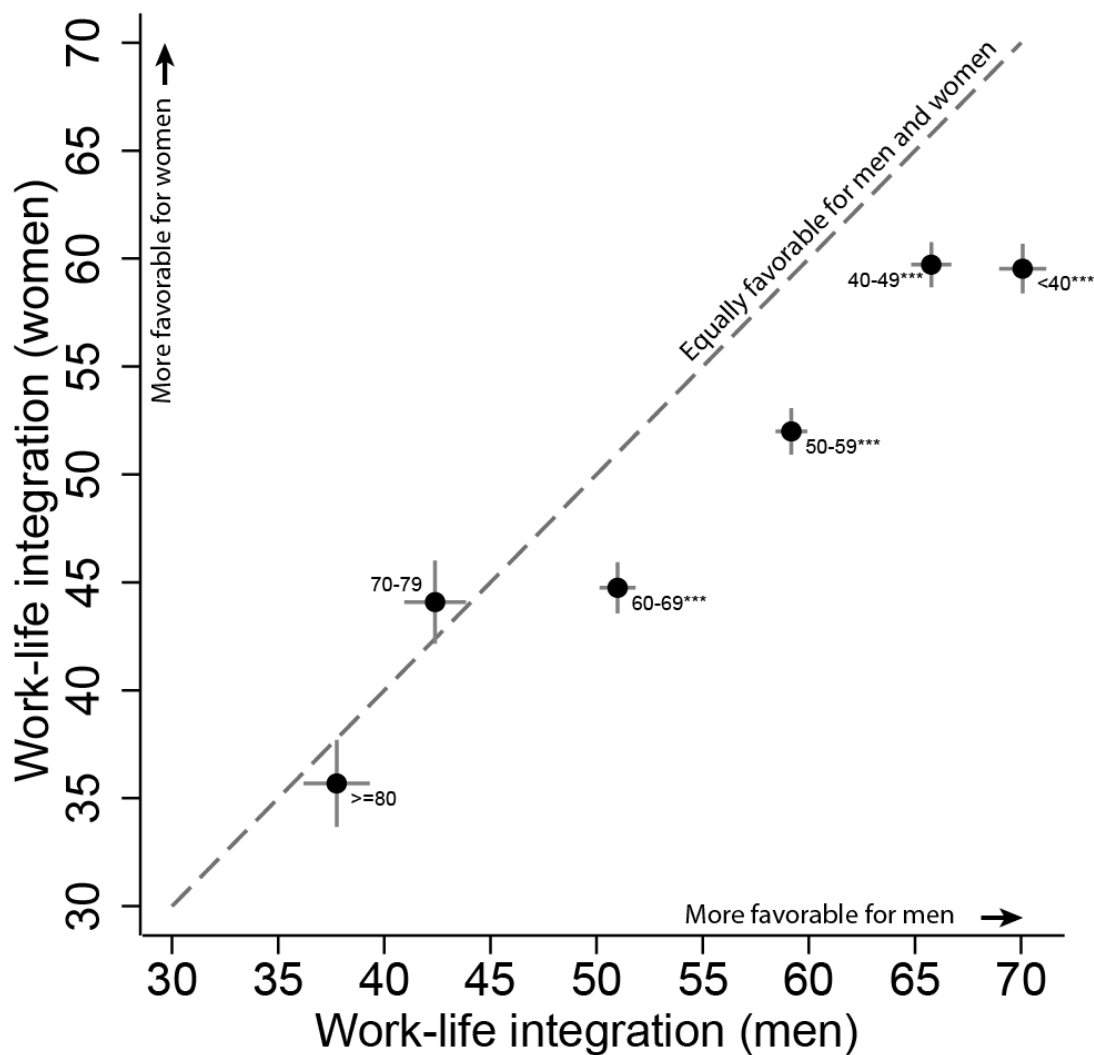

**eFigure 5.** Work-life integration by hours worked per week, for males (x-axis) and females (y-axis), shown as means and standard errors. Asterisks denote significantly different work-life integration scores between male and female respondents, via two-tailed t-test. \* indicates  $P < .05$ ; \*\* indicates  $P < .01$ ; \*\*\* indicates  $P < .001$

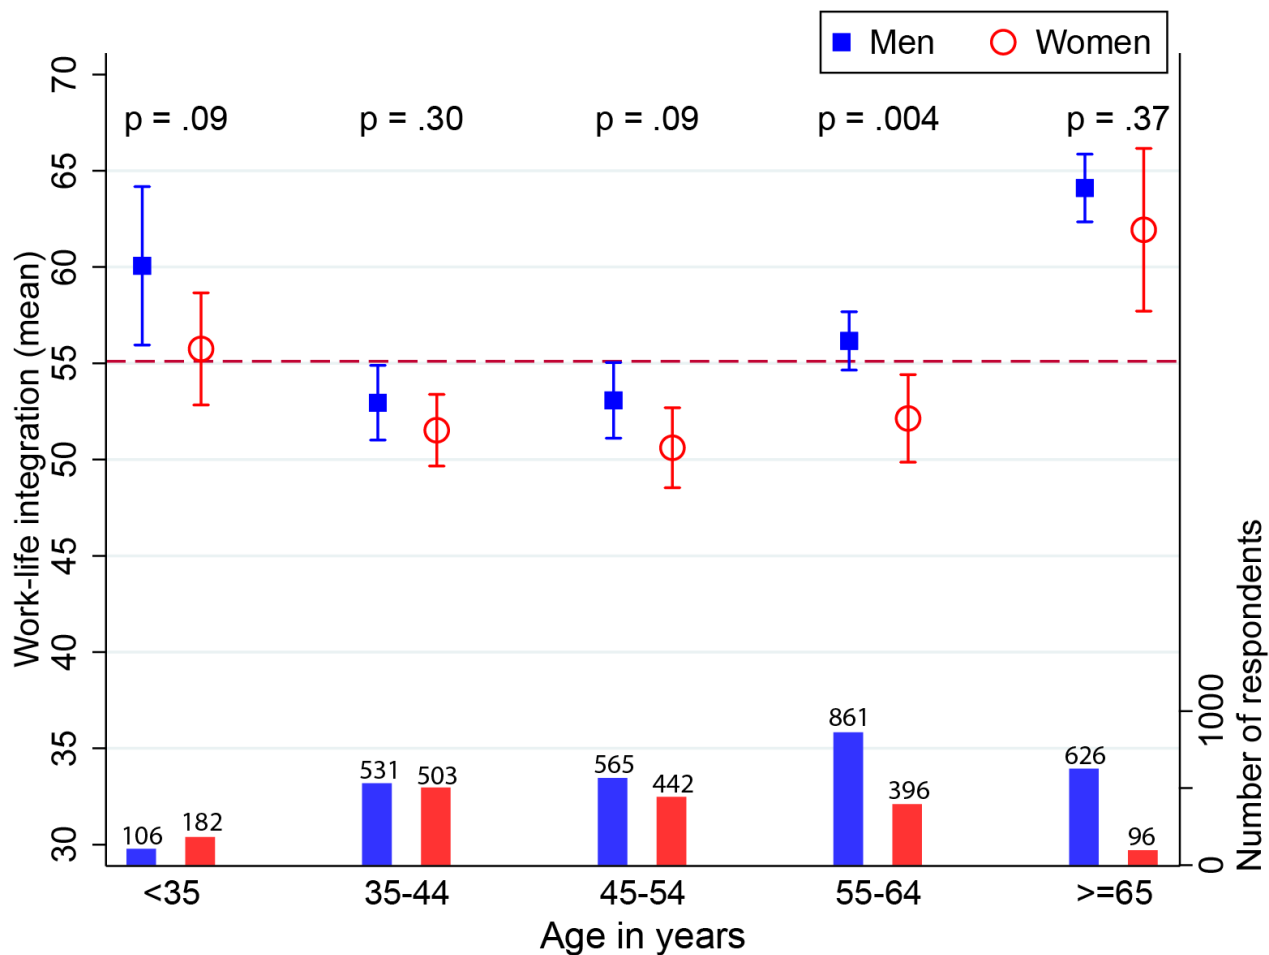

**eFigure 6.** Problems with work-life integration by physician sex and physician age. Data shown as means and 95% confidence intervals. P values obtained via two-tailed t-test. Number of respondents within each category shown for reference. Reference line at the population mean of 55.1.

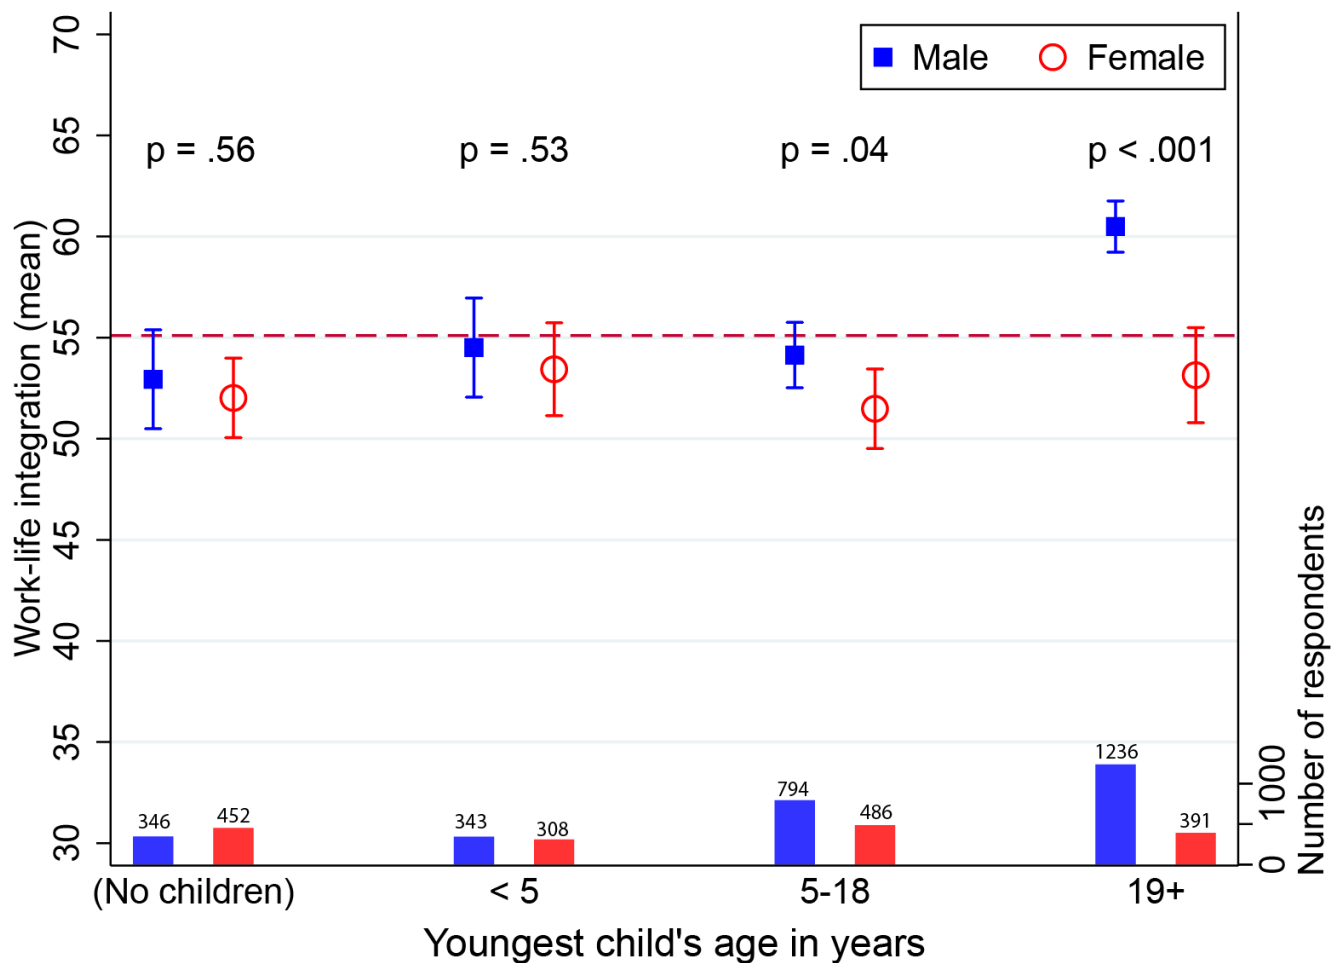

**eFigure 7.** Work-life integration by physician sex and youngest child's age in years. Data shown as means and 95% confidence intervals. P values obtained via two-tailed t-test. Number of respondents within each category shown for reference. Reference line at the population mean of 55.1.



**eTable 1.** Univariate screen of variables associated with work-life integration.

|                                             | <b>Coefficient</b> | <b>SE</b> | <b>P-value</b> | <b>Overall P-value*</b> |
|---------------------------------------------|--------------------|-----------|----------------|-------------------------|
| <b>Specialty</b>                            |                    |           |                | <.001                   |
| Internal Medicine Subspecialty              | -1.3               | 3.9       | .74            |                         |
| General Internal Medicine                   | -0.9               | 3.9       | .82            |                         |
| Psychiatry                                  | 5.1                | 3.9       | .20            |                         |
| Family Medicine                             | -1.6               | 3.9       | .67            |                         |
| General Surgery Subspecialty                | -8.0               | 3.9       | .04            |                         |
| Emergency Medicine                          | -10.2              | 4.0       | .01            |                         |
| Orthopedic Surgery                          | -0.7               | 4.0       | .86            |                         |
| General Pediatrics                          | 5.8                | 4.0       | .15            |                         |
| Anesthesiology                              | -1.3               | 4.1       | .75            |                         |
| Pediatric Subspecialty                      | 1.1                | 4.1       | .78            |                         |
| Radiology                                   | 1.3                | 4.1       | .75            |                         |
| Neurology                                   | 1.2                | 4.1       | .76            |                         |
| Obstetrics and Gynecology                   | -4.5               | 4.2       | .28            |                         |
| General Surgery                             | -8.1               | 4.2       | .054           |                         |
| Ophthalmology                               | 7.6                | 4.2       | .07            |                         |
| Pathology                                   | 4.0                | 4.3       | .35            |                         |
| Dermatology                                 | 6.4                | 4.3       | .13            |                         |
| Physical Medicine and Rehabilitation        | -1.1               | 4.3       | .81            |                         |
| Neurosurgery                                | -8.4               | 4.8       | .08            |                         |
| Radiation Oncology                          | -0.5               | 5.3       | .92            |                         |
| Otolaryngology                              | -2.3               | 5.3       | .66            |                         |
| Urology                                     | -13.7              | 5.7       | .02            |                         |
| Preventive Medicine / Occupational Medicine | -0.0               | 6.0       | .99            |                         |
| Other                                       | 1.6                | 4.3       | .71            |                         |
|                                             |                    |           |                |                         |
| <b>Age (years)</b>                          |                    |           |                | <.001                   |
| < 35                                        | 4.6                | 3.2       | .16            |                         |
| 35-44                                       | -0.6               | 3.0       | .85            |                         |
| 45-54                                       | -0.8               | 3.0       | .79            |                         |
| 55-64                                       | 2.1                | 3.0       | .49            |                         |
| ≥ 65                                        | 11.0               | 3.1       | <.001          |                         |
|                                             |                    |           |                |                         |
| <b>Years in Practice (per year)</b>         | 0.3                | 0.0       | <.001          |                         |
|                                             |                    |           |                |                         |
| <b>Nights on call per week (per night)</b>  | -1.6               | 0.2       | <.001          |                         |
|                                             |                    |           |                |                         |
| <b>Hours worked per week</b>                |                    |           |                | <.001                   |
| < 40                                        | 16.0               | 2.6       | <.001          |                         |
| 40-49                                       | 14.3               | 2.6       | <.001          |                         |
| 50-59                                       | 7.7                | 2.6       | .003           |                         |
| 60-69                                       | 0.08               | 2.6       | .98            |                         |
| 70-79                                       | -5.9               | 2.8       | .03            |                         |
| ≥ 80                                        | -11.9              | 2.8       | <.001          |                         |
|                                             |                    |           |                |                         |
| <b>Primary practice setting</b>             |                    |           |                | <.001                   |
| Private Practice                            | 15.0               | 4.2       | <.001          |                         |
| Academic Medical Center                     | 11.1               | 4.2       | .009           |                         |
| Veteran's Hospital                          | 17.4               | 4.8       | <.001          |                         |
| Active Military Practice                    | 11.8               | 5.3       | .03            |                         |

|                                                                                                                                                                                                              |      |     |       |       |
|--------------------------------------------------------------------------------------------------------------------------------------------------------------------------------------------------------------|------|-----|-------|-------|
| Not In Practice or Retired                                                                                                                                                                                   | 19.1 | 4.8 | <.001 |       |
| Other                                                                                                                                                                                                        | 13.2 | 4.2 | .002  |       |
| <b>Sex</b>                                                                                                                                                                                                   |      |     |       | <.001 |
| Male                                                                                                                                                                                                         | 10.2 | 5.2 | .052  |       |
| Female                                                                                                                                                                                                       | 5.7  | 5.2 | .28   |       |
| Other                                                                                                                                                                                                        | -9.2 | 8.9 | .30   |       |
| <b>White/Caucasian</b>                                                                                                                                                                                       | 0.9  | 0.9 | .31   |       |
| <b>Asian</b>                                                                                                                                                                                                 | 0.3  | 1.1 | .78   |       |
| <b>Black/African American</b>                                                                                                                                                                                | -3.5 | 2.1 | .10   |       |
| <b>American Indian/Alaskan Native</b>                                                                                                                                                                        | 2.2  | 5.1 | .67   |       |
| <b>Pacific Islander/Native Hawaiian</b>                                                                                                                                                                      | 1.5  | 4.7 | .76   |       |
| <b>Hispanic or Latino</b>                                                                                                                                                                                    | -1.0 | 1.5 | .48   |       |
| <b>Other</b>                                                                                                                                                                                                 | 0.8  | 1.6 | .63   |       |
| <b>Relationship status</b>                                                                                                                                                                                   |      |     |       | <.001 |
| Married                                                                                                                                                                                                      | 9.4  | 4.9 | .054  |       |
| Single                                                                                                                                                                                                       | 3.4  | 5.0 | .50   |       |
| Partnered                                                                                                                                                                                                    | 6.5  | 5.1 | .21   |       |
| Widow/Widower                                                                                                                                                                                                | 11.0 | 5.8 | .06   |       |
| <b>Age of youngest child</b>                                                                                                                                                                                 |      |     |       | <.001 |
| (no children)                                                                                                                                                                                                | -8.0 | 1.0 | <.001 |       |
| < 5 years                                                                                                                                                                                                    | -6.2 | 1.1 | <.001 |       |
| 5-18 years                                                                                                                                                                                                   | -7.1 | 0.9 | <.001 |       |
| ≥ 19 years                                                                                                                                                                                                   | -6.4 | 1.3 | <.001 |       |
| N = 4370 respondents. Dependent variable is work-life integration score (0-100 point scale) Estimates via separate univariate linear regressions. *Overall P-values for categorical variables via Wald test. |      |     |       |       |

**eTable 2.** Interaction model. Multivariable linear regression showing personal/professional factors and interactions as independent variables associated with work-life integration.

| Variable                                             | Coefficient | SE    | P-value | Overall P-value* |
|------------------------------------------------------|-------------|-------|---------|------------------|
| Intercept                                            | 74.32       | 2.69  | <.001   |                  |
| Woman (vs. man)                                      | -7.72       | 3.09  | .01     |                  |
| Age in years (vs. < 35 years)                        |             |       |         | .008             |
| 35-44                                                | -7.53       | 2.24  | .001    |                  |
| 45-54                                                | -6.88       | 2.38  | .004    |                  |
| 55-64                                                | -5.92       | 2.42  | .01     |                  |
| ≥ 65                                                 | -4.36       | 2.57  | .09     |                  |
| Sex-Age interaction                                  |             |       |         | .04              |
| Woman, 35-44 years                                   | 3.08        | 2.90  | .29     |                  |
| Woman, 45-54 years                                   | 1.15        | 3.13  | .71     |                  |
| Woman, 55-64 years                                   | 2.12        | 3.29  | .52     |                  |
| Woman, ≥ 65 years                                    | 9.47        | 3.98  | .02     |                  |
| Relationship status (vs. married)                    |             |       |         | .84              |
| Single                                               | -0.31       | 1.62  | .85     |                  |
| Partnered                                            | 0.28        | 2.30  | .90     |                  |
| Widow/Widower                                        | -6.87       | 7.84  | .38     |                  |
| Youngest child's age (vs. no children)               |             |       |         | .01              |
| < 5 years                                            | 3.70        | 1.82  | .04     |                  |
| 5-18 years                                           | 4.24        | 1.63  | .009    |                  |
| ≥ 19 years                                           | 5.73        | 1.72  | .001    |                  |
| Sex-Youngest child's age interaction                 |             |       |         | .02              |
| Woman, youngest child < 5 years                      | -3.97       | 2.36  | .09     |                  |
| Woman, youngest child 5-18 years                     | -5.02       | 2.09  | .02     |                  |
| Woman, youngest child ≥ 19 years                     | -7.00       | 2.41  | .004    |                  |
| Relationship status-Youngest child's age interaction |             |       |         | <.001            |
| Single, youngest child < 5 years                     | -11.73      | 5.95  | .049    |                  |
| Single, youngest child 5-18 years                    | -7.92       | 2.76  | .004    |                  |
| Single, youngest child ≥ 19 years                    | -3.87       | 2.70  | .15     |                  |
| Partnered, youngest child < 5 years                  | -2.58       | 7.61  | .74     |                  |
| Partnered, youngest child 5-18 years                 | -11.46      | 4.59  | .01     |                  |
| Partnered, youngest child ≥ 19 years                 | -4.69       | 3.83  | .22     |                  |
| Widow/Widower, youngest child < 5 years              | 64.67       | 21.88 | .003    |                  |
| Widow/Widower, youngest child 5-18 years             | 18.23       | 9.83  | .06     |                  |
| Widow/Widower, youngest child ≥ 19 years             | 2.23        | 8.84  | .80     |                  |
| Specialty (vs. Internal Medicine Subspecialty)       |             |       |         | <.001            |
| Anesthesiology                                       | -2.85       | 1.72  | .10     |                  |
| Dermatology                                          | 2.60        | 2.16  | .23     |                  |
| Emergency Medicine                                   | -17.44      | 1.66  | <.001   |                  |
| Family Medicine                                      | -3.50       | 1.46  | .02     |                  |
| Radiology                                            | 0.87        | 1.85  | .64     |                  |
| Neurology                                            | 0.07        | 1.88  | .97     |                  |
| Obstetrics and Gynecology                            | -1.57       | 1.91  | .41     |                  |
| Ophthalmology                                        | 2.90        | 2.08  | .16     |                  |
| Pathology                                            | 3.43        | 2.12  | .10     |                  |
| Physical Medicine and Rehabilitation                 | -2.35       | 2.24  | .29     |                  |
| Psychiatry                                           | 1.33        | 1.46  | .36     |                  |
| Other                                                | -1.02       | 2.19  | .64     |                  |
| General Internal Medicine                            | -0.43       | 1.45  | .76     |                  |

|                                           |        |      |       |       |
|-------------------------------------------|--------|------|-------|-------|
| General Pediatrics                        | 2.50   | 1.70 | .14   |       |
| Pediatric Subspecialty                    | 2.23   | 1.79 | .21   |       |
| General Surgery                           | -5.07  | 2.01 | .01   |       |
| General Surgery Subspecialty              | -3.69  | 1.48 | .01   |       |
| Neurosurgery                              | 0.92   | 3.07 | .76   |       |
| Orthopedic Surgery                        | -0.72  | 1.65 | .66   |       |
| Otolaryngology                            | -2.02  | 3.56 | .57   |       |
| Urology                                   | -10.07 | 4.02 | .01   |       |
| Preventive Medicine/Occupational Medicine | -3.35  | 4.47 | .45   |       |
| Radiation Oncology                        | -2.31  | 3.57 | .52   |       |
| Hours worked per week (vs. < 40 hours)    |        |      |       | <.001 |
| 40-49                                     | -4.54  | 1.43 | .001  |       |
| 50-59                                     | -12.28 | 1.37 | <.001 |       |
| 60-69                                     | -19.84 | 1.40 | <.001 |       |
| 70-79                                     | -28.07 | 1.80 | <.001 |       |
| ≥ 80                                      | -32.79 | 1.90 | <.001 |       |
| Sex-Hours interaction                     |        |      |       | <.001 |
| Woman, 40-49 hours per week               | 3.58   | 2.08 | .09   |       |
| Woman, 50-59 hours per week               | 3.18   | 2.05 | .12   |       |
| Woman, 60-69 hours per week               | 3.93   | 2.15 | .07   |       |
| Woman, 70-79 hours per week               | 12.17  | 2.87 | <.001 |       |
| Woman, ≥ 80 hours per week                | 7.97   | 2.91 | .006  |       |

N = 4370 respondents. Dependent variable is work-life integration score (0-100 point scale) Estimates via multivariable linear regression with all covariates shown. \*Overall *P*-values for categorical variables via Wald test.
